# Supplementary material for: Fish Traders as Key Actors in Fisheries: Gender and Adaptive Management
Source: Ambio. 2013 Nov 9;42(8):951–62. doi: 10.1007/s13280-013-0451-1 (PMC3824874; doi:10.1007/s13280-013-0451-1)
Supplement: Supplementary file 1 — Supplementary material 1 (PDF 156 kb) [file 13280_2013_451_MOESM1_ESM.pdf]

*AMBIO*

**Electronic Supplementary Material**

Fish Traders as Key Actors in Fisheries: Gender and Adaptive Management

**Sara Fröcklin, Maricela de la Torre-Castro, Lars Lindström, Narriman S Jiddawi**

## Appendix S1 Interview form

**ID**

### Gender roles in fish trading, Zanzibar 2012

Supervisor..... Date and village.....

Interpreter.....

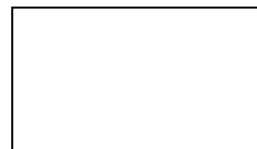

#### I. General information

- Respondent's name
- Age in years (or approximation)
- Marital status (married, single, divorced)
- Husband has other wives? (Yes or no and how many)
- How many children do you have? Boys/girls
- Education: ☐ no education ☐ Quran ☐ primary ☐ secondary ☐ other higher
- How many persons live permanently in this household?
- Who is the head of the household?
- Health status (good/medium/bad)

#### II. "A typical day as a fish trader"

Please tell me about a normal day as a fish monger, what do you do? What is the routine at home before going to the market?

- How do you get to the market?
- Is it always the same market?
- What kind of money do you use? Do you have a special pot of money just for fish trade? Do you get money from someone else? Explain.
- How do you decide where to go?

- How do you decide what fishes to buy?

### III. Understanding the market: the broad picture

- How does this activity works in terms of money?
- Where do you get the money to buy fish?
- Do you have a specific pot of money used just to buy fish? From hotels? From microcredit or other?
- How do you handle the money you get from daily fish trade? For example, you get 30,000 TSH in your hand today, what do you do later? Do you put 30,000 TSH in the “pot” or you take 25,000 TSH in the pot and 5,000 TSH for family expenses? How do you do? Please explain!

### IV. Equipment and materials (yes/no and 1. Not important 2. Medium 3. Very important)

| Equipment   | Women<br>yes/no | Importance 1-3 | Men<br>yes/no | Importance 1-3 |
|-------------|-----------------|----------------|---------------|----------------|
| Cell phones |                 |                |               |                |
| Bicycle     |                 |                |               |                |
| Motorcycle  |                 |                |               |                |
| Freezer     |                 |                |               |                |
| Fridge      |                 |                |               |                |
| Baskets     |                 |                |               |                |
| Knives      |                 |                |               |                |
| Table       |                 |                |               |                |
| Calculator  |                 |                |               |                |
| Ice         |                 |                |               |                |
| Scissors    |                 |                |               |                |
| Bags        |                 |                |               |                |

## **V. Economic resources**

- How much money you buy fish for per day?
- Is it always the same amount or is there variation?
- And why?
- How much money per day approx. do you get from fish trade?
- How much of that money you take as income?
- How much of that money you reinvest in the pot? (link to part III understanding the market)
- Besides buying fish, what other expenses associated with this activity do you have?
- Do you have any microcredit or other forms of support, loans?

## **VI. Knowledge**

- How do you decide what fish to buy?
- How do you know in which market to buy?
- How do you know to whom to sale fish?
- Who are your best customers?
- Would you like to have other customers?
- Do you know how other traders work?
- Alone or with assistance from friend, relative, family or other?
- Do you gain “tips” and/ or experience from other traders/friends/family?
- Do you know what species are best to get good money?
- If so, what species?
- Do you know what species are best to get good food?
- If so, what species and why?

## **VII. Contacts**

- Do you have any contacts in hotels, restaurants?
- Other contacts (for example friends, family) that is important to you or help you with this activity?

- Do you get assistance during the auction?
- From whom?
- Why do you need assistance?
- Do you have any contact with the Department of fisheries and marine resources?
- If no, have you heard of it or other fish traders that are in contact with this department?

### **VIII. Organization**

- Do you belong to any organization?
- Cooperative?
- Fish trading association?
- NGO?
- If yes, what do you gain from the membership?
- If no, have you heard of any of these organizations? Or other?
- Do you know if other fish mongers are involved?
- Why are you not involved in any organization, cooperative or other?
- What would you need to get involved? Meeting places? Time?
- How would men react of a cooperative that increased women's incomes?
- If they would not be happy, how would you go about?

### **IX. Household duties and decision making**

- What are your main responsibilities in the household?
- How much time do you spend on different household chores? In relation to other family members?
- How much free time do you have? Compared to your husband/wife?
- How much time do you spend on fish trade?
- Would you spend more time on fish trade if you had less household work?
- What issues and resources in the household do you decide over? What else would you like to decide?

## **X. Markets and Mobility**

- Are you happy with your market and with your buyers?
- Or would you like to buy and sell fish somewhere else?
- Or would you like to have other buyers?
- If yes, what kind of buyers would you like?
- How do you cope with a bad market (fewer buyers, decreasing fish, and high price)?
- Do you have the possibility to go to another market if this one is bad?
- If so, what kind of transport do you use and how often do you go?
- How accessible are the roads, good/bad?

## **XI. Perceptions and experiences**

- Would you identify yourself as a fish trader?
- Or something else?
- Are you satisfied/proud of being a fish trader?
- Why/why not?
- Is fish trading high status in the society?
- What effects has fish trade had on your life (e.g. income, increased decision making power in the household)?
- On the community (increased decision making power, poverty alleviation, and development)?
- Do you feel like you have the resources to cope with changes in the fishery and/or the market (decreasing fish stocks, increasing prices in fish, fuel wood, oil etc.?)
- What are your strategies to handle those?
- What are your dreams and hopes for the future?

| <b>Species/local</b>      | <b>Buy yes/no</b> | <b>Economic</b> | <b>Food</b> |
|---------------------------|-------------------|-----------------|-------------|
| Tasi/Rabbitfish           |                   |                 |             |
| Pono/Parrotfish           |                   |                 |             |
| Changu/Emperor            |                   |                 |             |
| Chewa/Grouper             |                   |                 |             |
| Mkundaji/Goatfish         |                   |                 |             |
| Puju/Surgeon              |                   |                 |             |
| Mkizi/Mullet              |                   |                 |             |
| Dagaa/Sardine             |                   |                 |             |
| Vibua/Mackerel            |                   |                 |             |
| Kole kole/Trevally        |                   |                 |             |
| Jodari/Tuna               |                   |                 |             |
| Nduaro/Swordfish          |                   |                 |             |
| Nguru/Kingfish            |                   |                 |             |
| Mzia/Barracuda            |                   |                 |             |
| Papa/Taa/Shark/Ray        |                   |                 |             |
| Pweza/Ngisi/Octopus/Squid |                   |                 |             |
| Kamba/Lobster             |                   |                 |             |
| Wengineo/Others           |                   |                 |             |

**Table S2** Market, transport means and average daily distance

| <i>Gender</i> | <i>Auction</i>    | <i>End market</i>  | <i>Transport</i> | <i>Distance (km)</i> |
|---------------|-------------------|--------------------|------------------|----------------------|
| W             | Chwaka, Uroa      | Town, food kiosks* | Dala dala        | 60                   |
| W             | Darajani          | Town*              | Dala dala        | 5                    |
| W             | Malindi           | Mwanakwerekwe**    | Dala dala        | 10                   |
| W             | Malindi           | Mwanakwerekwe **   | Dala dala        | 10                   |
| W             | Malindi,          | Mwanakwerekwe **   | Dala dala        | 10                   |
| W             | Darajani          | Mwanakwerekwe **   | Dala dala        | 10                   |
| W             | Malindi           | Town*              | Dala dala        | 5                    |
| W             | Malindi           | Town*              | Walk             | 3                    |
| W             | Marumbi           | Town*              | Dala dala        | 60                   |
| W             | Marumbi           | Bambi*             | Dala dala        | 30                   |
| W             | Mkokotoni         | Amani*             | Dala dala        | 70                   |
| W             | Mkokotoni         | Mahonda*           | Dala dala        | 30                   |
| W             | Malindi, Darajani | Mikunguni*         | Dala dala        | 20                   |
| W             | Malindi           | Mikunguni*         | Dala dala        | 20                   |
| W             | Malindi           | Mikunguni*         | Dala dala        | 10                   |
| W             | Malindi           | Mikunguni*         | Dala dala        | 10                   |
| W             | Nungwi            | Amani*             | Dala dala        | 100                  |
| W             | Nungwi            | Mikunguni*         | Dala dala        | 100                  |
| W             | Uroa              | Jendele*           | Dala dala        | 30                   |
| W             | Uroa              | Amani *            | Dala dala        | 60                   |
| W             | Uroa, Chwaka      | Town*              | Dala dala        | 60                   |
| M             | Chwaka            | Koani*             | Bicycle          | 30                   |
| M             | Chwaka            | Fuoni**            | Bicycle          | 40                   |
| M             | Darajani          | Darajani ***       | Dala dala        | 6                    |

|   |           |                                   |                   |      |
|---|-----------|-----------------------------------|-------------------|------|
| M | Darajani  | Darajani***                       | Dala dala         | 6    |
| M | Malindi   | Mwanakwerekwe **                  | Dala dala         | 10   |
| M | Malindi   | Malindi***                        | Dala dala         | 6    |
| M | Malindi   | Malindi***                        | Walk              | 6    |
| M | Marumbi   | Town *                            | Bicycle/dala dala | 60   |
| M | Matemwe   | Matemwe*, Town ****               | Walk/dala dala    | 0-80 |
| M | Matemwe   | Malindi****                       | Dala dala         | 80   |
| M | Matemwe   | Matemwe ***                       | Walk              | 0    |
| M | Mkokotoni | Town**                            | Dala dala         | 5    |
| M | Mkokotoni | Mkokotoni*                        | Dala dala         | 5    |
| M | Nungwi    | Nungwi*****                       | Walk              | 0    |
| M | Nungwi    | Darajani ***                      | Bicycle           | 100  |
| M | Nungwi    | Darajani *****                    | Walk/dala dala    | 100  |
| M | Nungwi    | Malindi/ Darajani ****            | Walk/dala dala    | 100  |
| M | Nungwi    | Malindi/ Darajani****             | Walk/dala dala    | 100  |
| M | Nungwi    | Malindi/Darajani****, Nungwi***** | Walk/dala dala    | 100  |
| M | Uroa      | Uroa*****                         | Walk              | 0    |
| M | Uroa      | Uroa*                             | Walk              | 20   |

---

\* street vendor \*\* small market vendor \*\*\* Town market vendor \*\*\*\*auction \*\*\*\*\* hotel

**Table S3** Traded species (English and Swahili) from high to low value

| <i>Family</i>    | <i>English name</i> | <i>Local name (Swahili)</i> |
|------------------|---------------------|-----------------------------|
| Palinuridae      | Lobster             | Kamba                       |
| Carcharhinidae   | Shark               | Papa                        |
| Xiphiidae        | Swordfish           | Nduaro                      |
| Scombridae       | Kingfish            | Nguru                       |
| Scombridae       | Tuna                | Jodari                      |
| Lethrinidae      | Emperor             | Changu                      |
| Cephalopoda spp. | Octopus             | Pweza                       |
| Cephalopoda spp. | Squid               | Ngisi                       |
| Sphyraenidae     | Barracuda           | Mzia                        |
| Carangidae       | Trevally            | Kole kole                   |
| Serranidae       | Grouper             | Chewa                       |
| Mullidae         | Goatfish            | Mkundaji                    |
| Siganidae        | Rabbitfish          | Tasi                        |
| Scaridae         | Parrotfish          | Pono                        |
| Mugilidae        | Mullet              | Mkizi                       |
| Dasyatidae       | Ray                 | Taa                         |
| Scombridae       | Mackerel            | Vibua                       |
| Acanthuridae     | Surgeonfish         | Puju                        |
| Clupeidae        | Sardine             | Dagaa                       |
